# Supplementary material for: Green synthesis of copper oxide nanoparticles using Ficus elastica extract for the electrochemical simultaneous detection of Cd2+, Pb2+, and Hg2+
Source: Royal Society of Chemistry journal article supplement (doi:10.1039/d3ra02974c), 2023-01-01
Supplement: d3ra02974c1.pdf [file d3ra02974c1.pdf]

**Green synthesis of copper oxide nanoparticles using *Ficus elastica* extract for  
the electrochemical simultaneous detection of Cd<sup>2+</sup>, Pb<sup>2+</sup>, and Hg<sup>2+</sup>**

Djihane Slimane Ben Ali<sup>a,b</sup>, Ferial Krida<sup>a,c</sup>, MounaNacef<sup>d\*</sup>, El Hadi Boussaha<sup>a</sup>, Mohamed  
LyamineChelaghmia<sup>d</sup>, HabibaTabet<sup>c</sup>, RadiaSelaimia<sup>d</sup>, Amira Atamnia<sup>a,b</sup>, Abed Mohamed  
Affoune<sup>d</sup>

<sup>a</sup> Department of Process Engineering, Faculty of Technology, Université 20 Août 1955, El  
Hadaik Road, Skikda 21000, Algeria.

<sup>b</sup>LRPCSI-Laboratoire de Recherche sur la Physico-Chimie des Surfaces et Interfaces, Université  
20 Août 1955, Skikda 21000, Algeria.

<sup>c</sup> Chemical and Environmental Engineering Research Laboratory, LGCE.

<sup>d</sup>L.A.I.G.M, Université 8 Mai 1945 Guelma, BP 401, Guelma 24000, Algeria.

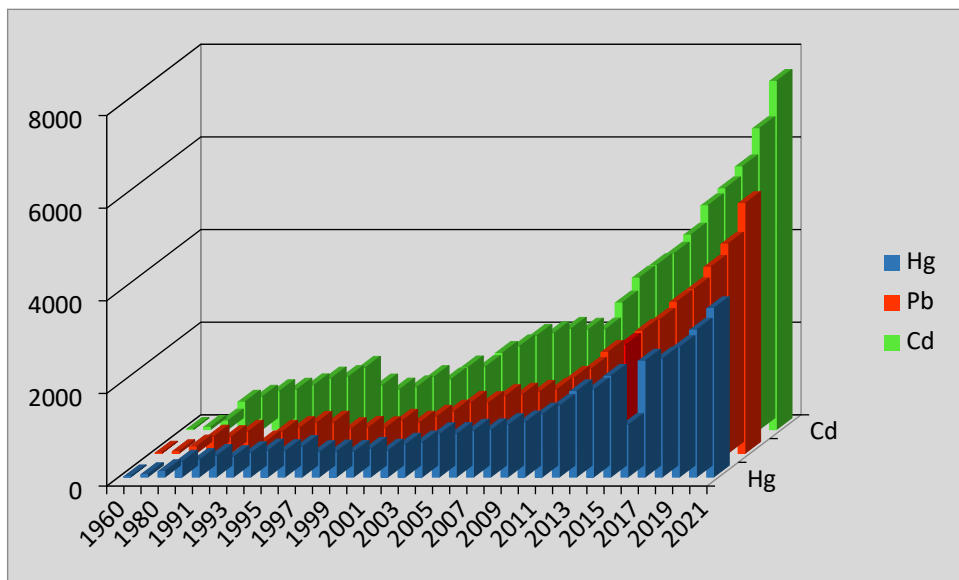

**Fig.S.1.**Published documents per year related to Cd<sup>2+</sup>, Pb<sup>2+</sup>, and Hg<sup>2+</sup> detection (from Science Direct database).

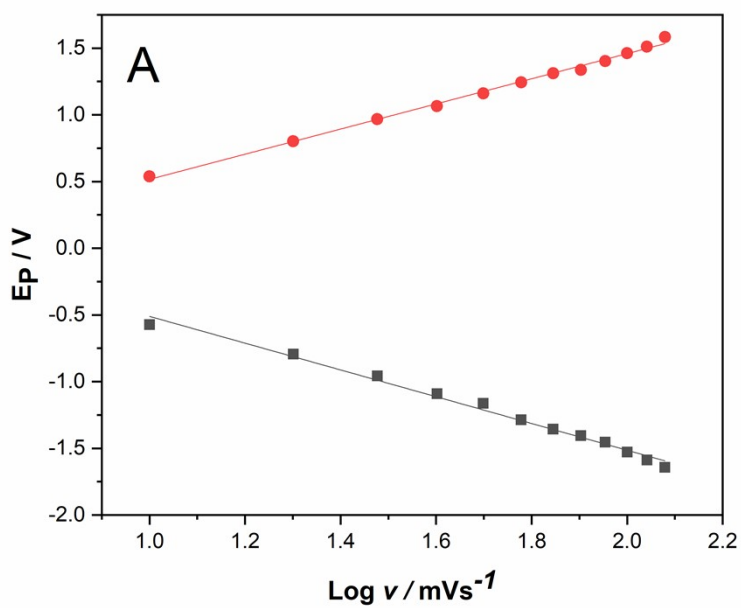

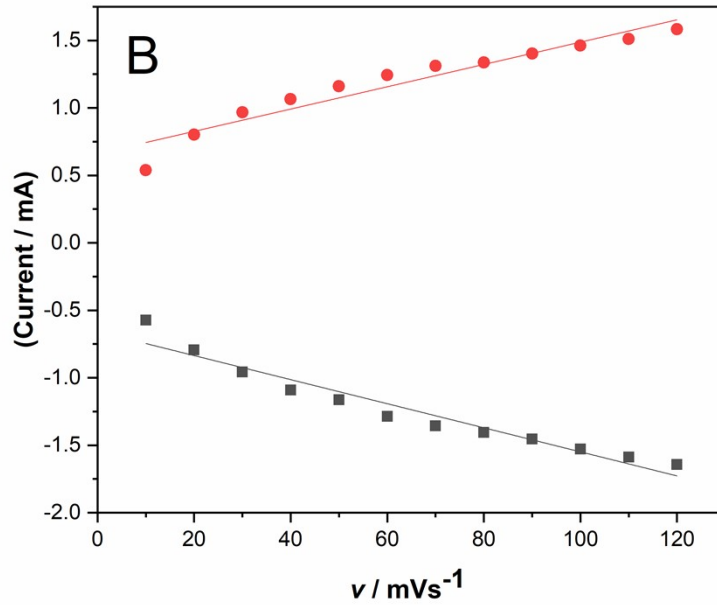

**Fig.S.2** (A) Laviron plot for CuONPs/PANI-CPE and (B) Peak currents vs. scan rates.

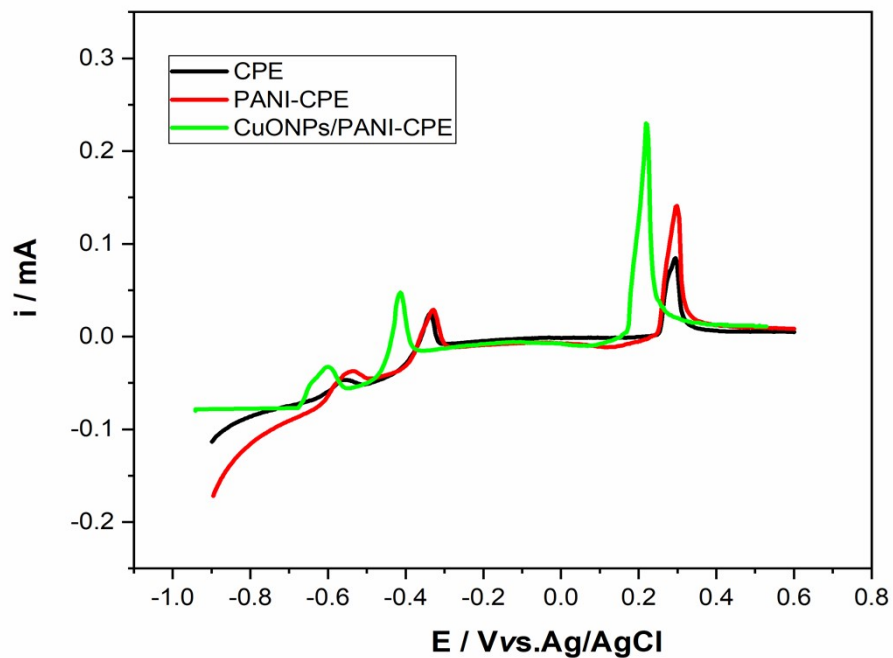

**Fig.S.3** Comparison of SWV on CPE (Black), PANI-CPE (red), and CuONPs/PANI-CPE (Green) electrodes for simultaneous detection of  $4.8 \mu\text{gL}^{-1}$   $\text{Cd}^{2+}$ ,  $\text{Pb}^{2+}$ , and  $\text{Hg}^{2+}$  in HCl solution (0.01M).

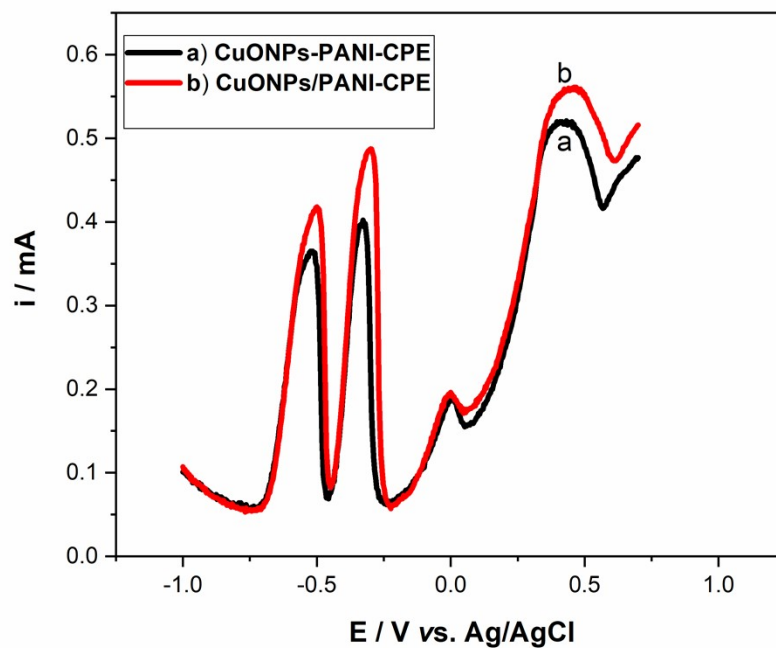

**Fig.S.4** Anodic peak currents on CuONPs/PANI-CPE in  $HCl(0.01M)$   $100.0 \mu g L^{-1}$   $Cd^{2+}$ ,  $Pb^{2+}$  and  $Hg^{2+}$  obtained by SWV as function of (a) CuONPs-PANI-CPE, (b) CuONPs/PANI-CPE.

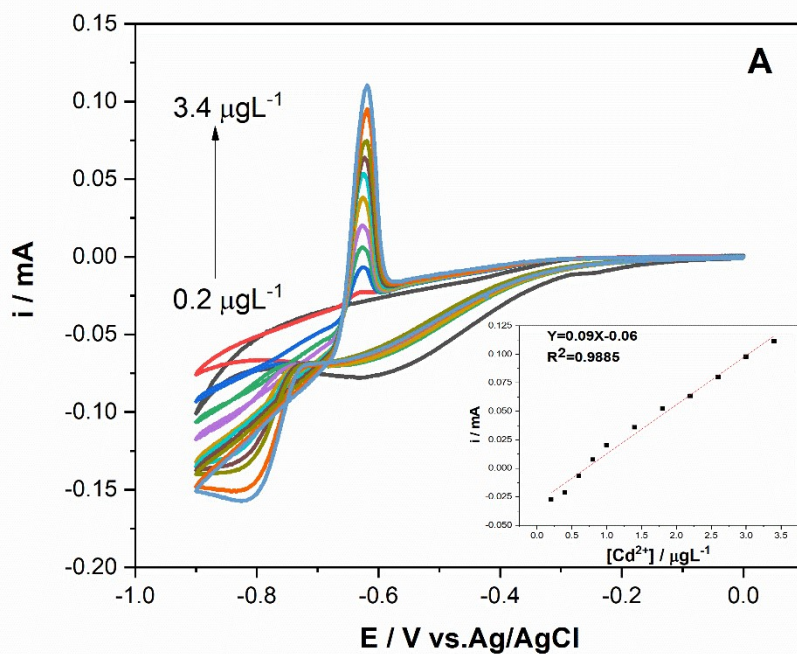

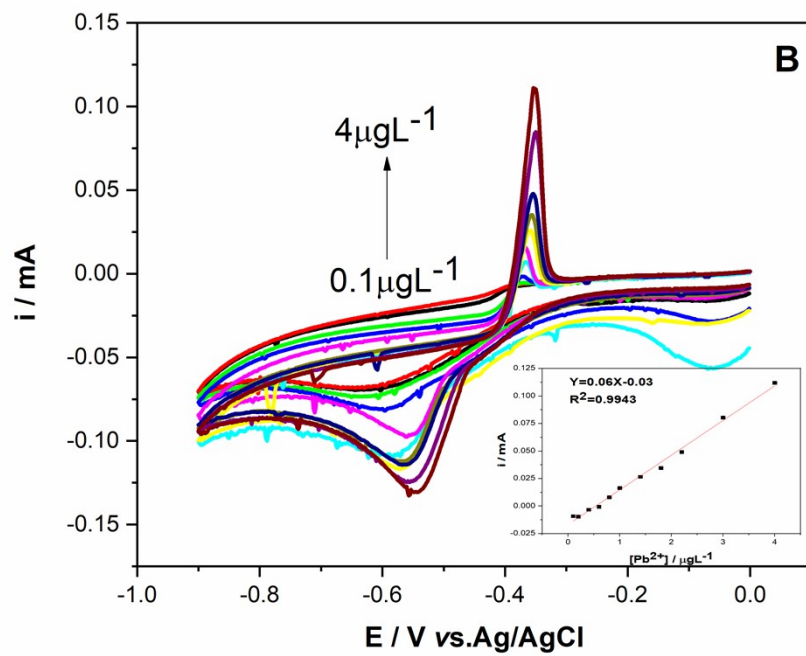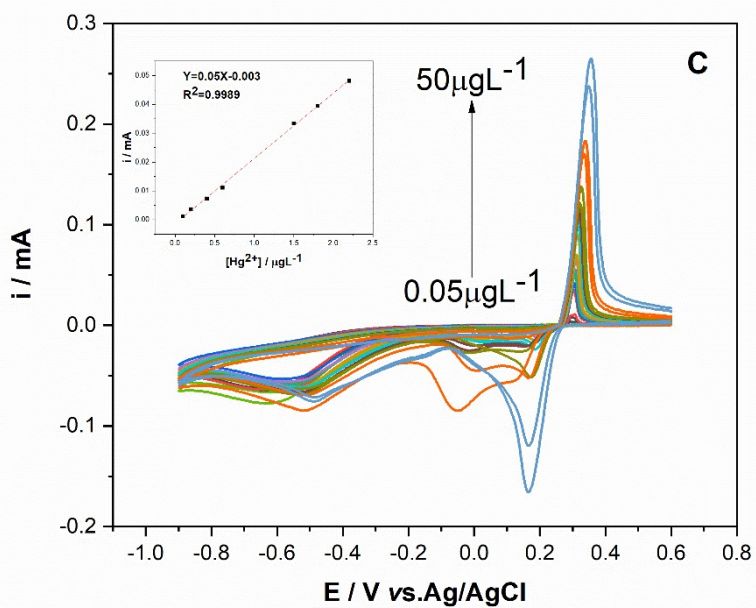

**Fig.S.5** (A) CV Curves of CuONPs/PANI-CPE in HCl (0.01M ) containing single different concentration of A:  $\text{Cd}^{2+}$ , B:  $\text{Pb}^{2+}$ , C:  $\text{Hg}^{2+}$ . Insets: the corresponding calibration curves.

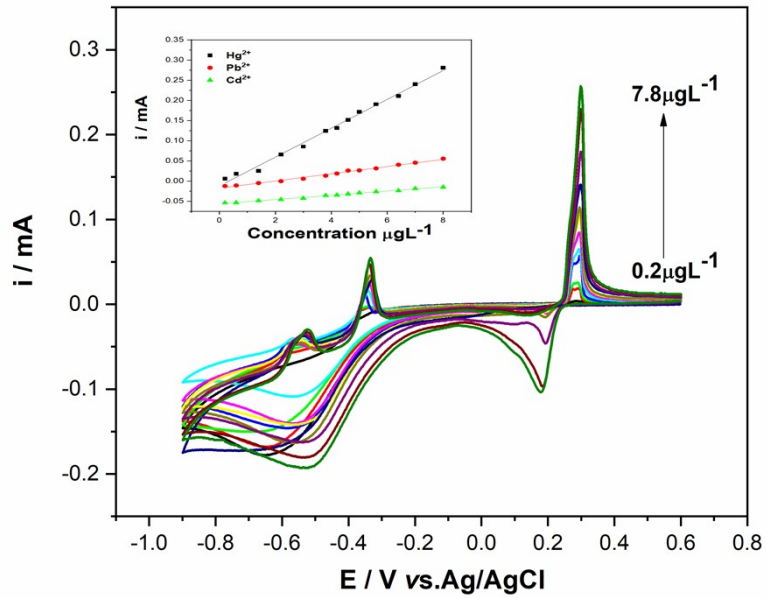

**Fig.S.6** CV Curves for simultaneous analysis of CuONPs/PANI-CPE in HCl (0.01M) containing  $[0.2 - 7.8] \mu\text{g/L}$  of  $\text{Cd}^{2+}$ ,  $\text{Pb}^{2+}$  and  $\text{Hg}^{2+}$  at scan rate of  $50 \text{ mVs}^{-1}$ . Inset : the calibration curve.

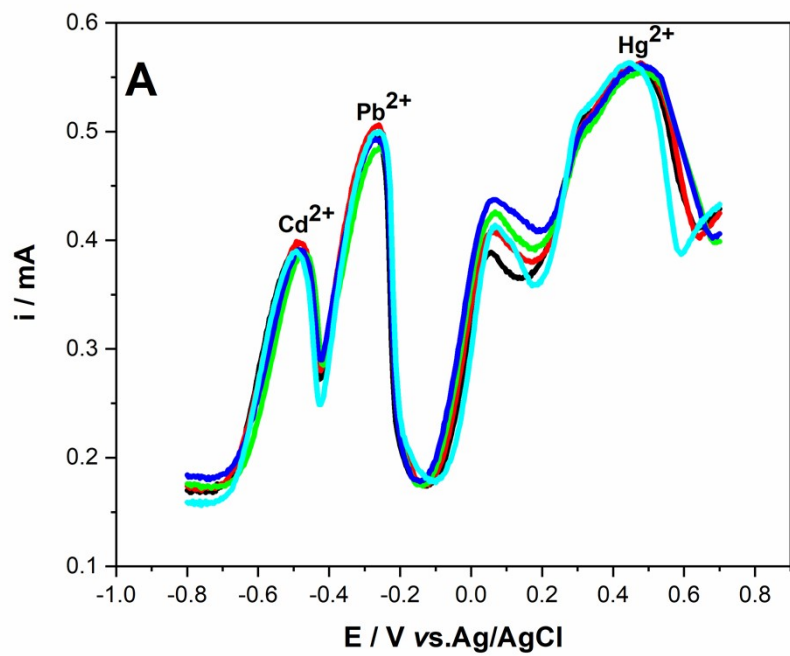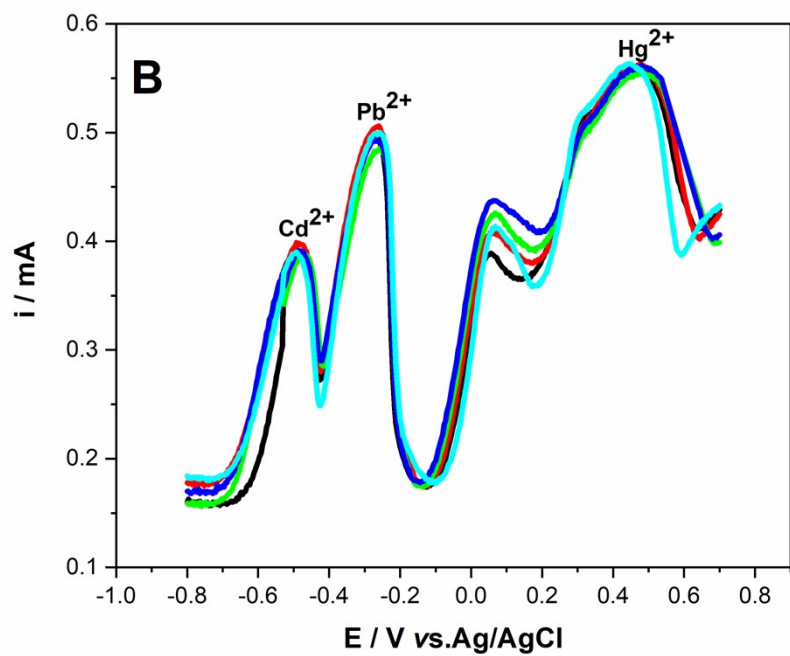

**Fig. S.7** SWV recorded in  $\text{Cd}^{2+}$ ,  $\text{Pb}^{2+}$  and  $\text{Hg}^{2+}$  ( $2.6 \mu\text{gL}^{-1}$ ) in  $\text{HCl}$  (0.01 M) on CuONPs/PANI-CPE for A : repeatability experiments and B : sensor stability over a month.

**Table. S.1.** Detection of Cd<sup>2+</sup>, Pb<sup>2+</sup>, and Hg<sup>2+</sup> in real waters using CuONPs/PANI-CPE electrode by SWV method.

| Sample                   | Cd <sup>2+</sup><br>Spiked<br>(µg L <sup>-1</sup> ) | Cd <sup>2+</sup><br>Found<br>(µg L <sup>-1</sup> ) | Recovery<br>(%) Cd <sup>2+</sup> | Pb <sup>2+</sup><br>Spiked<br>(µg L <sup>-1</sup> ) | Pb <sup>2+</sup><br>Found<br>(µg L <sup>-1</sup> ) | Recovery<br>(%) Pb <sup>2+</sup> | Hg <sup>2+</sup><br>Spiked<br>(µg L <sup>-1</sup> ) | Hg <sup>2+</sup><br>Found<br>(µg L <sup>-1</sup> ) | Recovery<br>(%) Hg <sup>2+</sup> |
|--------------------------|-----------------------------------------------------|----------------------------------------------------|----------------------------------|-----------------------------------------------------|----------------------------------------------------|----------------------------------|-----------------------------------------------------|----------------------------------------------------|----------------------------------|
| <b>Sea<br/>water</b>     | 0.0                                                 | 0.0                                                | -                                | 0.0                                                 | 0.0                                                | -                                | 0.0                                                 | 0.4                                                | -                                |
|                          | 0.6                                                 | 0.7                                                | 116.66                           | 0.6                                                 | 0.6                                                | 100                              | 0.6                                                 | 0.7                                                | 116.66                           |
|                          | 1.0                                                 | 1.1                                                | 110                              | 1.0                                                 | 0.98                                               | 98                               | 1.0                                                 | 1.1                                                | 110                              |
|                          | 1.4                                                 | 1.5                                                | 107.14                           | 1.4                                                 | 1.3                                                | 92.86                            | 1.4                                                 | 1.6                                                | 114.29                           |
|                          | 2.6                                                 | 2.8                                                | 107.69                           | 2.6                                                 | 2.8                                                | 107.69                           | 2.6                                                 | 3.0                                                | 115.38                           |
| <b>River<br/>water</b>   | 0.0                                                 | 0.0                                                | -                                | 0.0                                                 | 0.0                                                | -                                | 0.0                                                 | 0.0                                                | -                                |
|                          | 0.6                                                 | 0.6                                                | 100                              | 0.6                                                 | 0.6                                                | 100                              | 0.6                                                 | 0.7                                                | 116.66                           |
|                          | 1.0                                                 | 0.9                                                | 90                               | 1.0                                                 | 1.1                                                | 110                              | 1.0                                                 | 0.9                                                | 90                               |
|                          | 1.4                                                 | 1.3                                                | 92.85                            | 1.4                                                 | 1.4                                                | 100                              | 1.4                                                 | 1.6                                                | 114.29                           |
|                          | 2.6                                                 | 2.4                                                | 92.31                            | 2.6                                                 | 2.7                                                | 103.85                           | 2.6                                                 | 2.8                                                | 107.69                           |
| <b>Tap<br/>water</b>     | 0.0                                                 | 0.0                                                | -                                | 0.0                                                 | 0.0                                                | -                                | 0.0                                                 | 0.0                                                | -                                |
|                          | 0.6                                                 | 0.6                                                | 100                              | 0.6                                                 | 0.7                                                | 116.66                           | 0.6                                                 | 0.7                                                | 116.66                           |
|                          | 1.0                                                 | 0.9                                                | 90                               | 1.0                                                 | 1.1                                                | 110                              | 1.0                                                 | 0.9                                                | 90                               |
|                          | 1.4                                                 | 1.5                                                | 107.14                           | 1.4                                                 | 1.6                                                | 114.29                           | 1.4                                                 | 1.3                                                | 92.86                            |
|                          | 2.6                                                 | 2.7                                                | 103.85                           | 2.6                                                 | 2.7                                                | 103.85                           | 2.6                                                 | 2.9                                                | 111.54                           |
| <b>Mineral<br/>water</b> | 0                                                   | 0.0                                                | -                                | 0.0                                                 | 0.0                                                | -                                | 0.0                                                 | 0.0                                                | -                                |
|                          | 0.6                                                 | 0.6                                                | 100                              | 0.6                                                 | 0.7                                                | 116.66                           | 0.6                                                 | 0.6                                                | 100                              |
|                          | 1.0                                                 | 0.9                                                | 90                               | 1.0                                                 | 1.0                                                | 100                              | 1.0                                                 | 0.9                                                | 90                               |
|                          | 1.4                                                 | 1.3                                                | 92.85                            | 1.4                                                 | 1.5                                                | 107.14                           | 1.4                                                 | 1.3                                                | 92.86                            |
|                          | 2.6                                                 | 2.7                                                | 103.84                           | 2.6                                                 | 2.4                                                | 92.31                            | 2.6                                                 | 2.5                                                | 96.15                            |



# Real-sample analysis of water

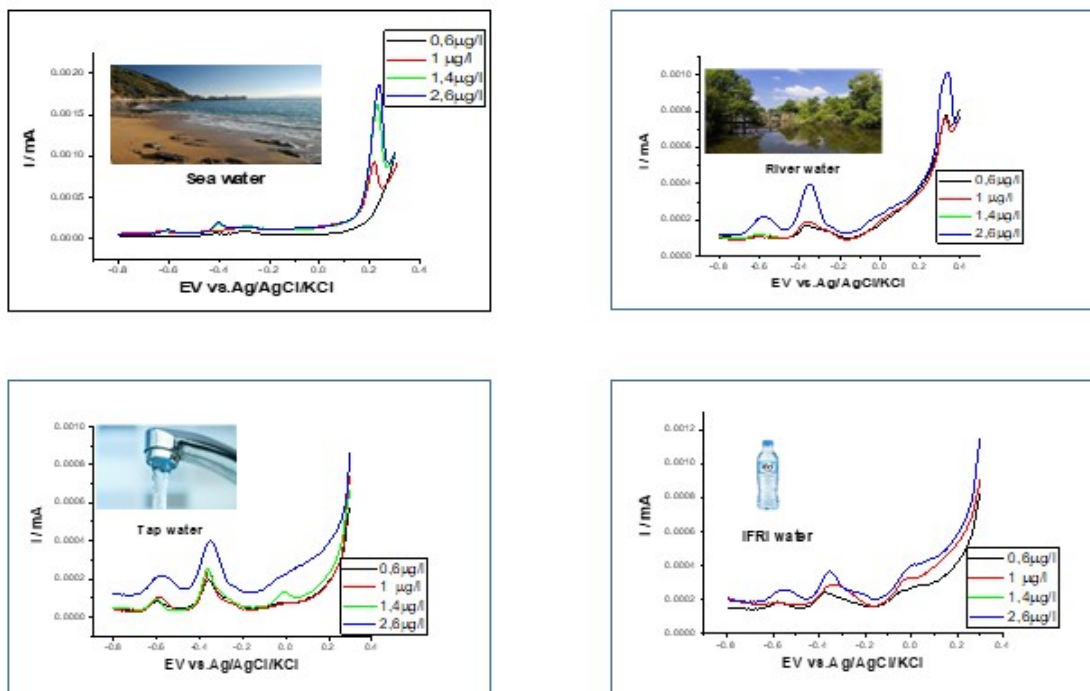

**Fig.S.8** Schematic illustration of simultaneous determination of  $\text{Cd}^{2+}$ ,  $\text{Pb}^{2+}$  and  $\text{Hg}^{2+}$  in real applications.
